# Supplementary material for: A genome-wide association study identified loci for yield component traits in sugarcane (Saccharum spp.)
Source: PubMed Central journal article supplement (PMC6638961; doi:10.1371/journal.pone.0219843), 2019-07-18
Supplement: pone.0219843.s001.pdf [file pone.0219843.s001.pdf]

**S1 Table. Names, Parents and Origins of 134 Accessions of the BPSG.**

| Accessions  | Parent 1              | Parent 2          | Origin     |
|-------------|-----------------------|-------------------|------------|
| EK28        | EK2                   | POJ100            | Java       |
| Badila      | <i>S. officinarum</i> | NG9615            | New Guinea |
| CB36-24     | POJ2878               | ?                 | Brazil     |
| CB40-13     | POJ2878               | Co290             | Brazil     |
| CB41-76     | POJ2878               | ?                 | Brazil     |
| CB45-155    | Co413                 | ?                 | Brazil     |
| CB45-3      | Co331                 | Co290             | Brazil     |
| CB46-47     | POJ2878               | ?                 | Brazil     |
| CB47-355    | POJ2878               | Co413             | Brazil     |
| CB49-260    | CB44-36               | ?                 | Brazil     |
| CB53-98     | CB46-40               | ?                 | Brazil     |
| Co290       | Co221                 | D74               | India      |
| Co331       | Co213                 | Co214             | India      |
| Co419       | POJ2878               | Co290             | India      |
| Co449       | POJ2878               | Co331             | India      |
| Co740       | P3247                 | P4775             | India      |
| Co997       | Co683                 | P63-32            | India      |
| CP51-22     | F36-819               | CP33-372          | USA        |
| CP52-68     | CP29-320              | CP38-34           | USA        |
| CP53-76     | F36-819               | CP36-46           | USA        |
| CP70-1547   | CP62-374              | CP57-526          | USA        |
| F31-962     | Co-281                | CP27-108          | Taiwan     |
| F36-819     | F31-962               | POJ2878           | Taiwan     |
| Ganda Cheni | <i>S. barberi</i>     | <i>S. barberi</i> | India      |
| H53-3989    | H48-3717              | ?                 | Hawaii     |
| H59-1966    | H50-676               | H49-3646          | Hawaii     |
| IAC48-65    | CP27-108              | ?                 | Brazil     |
| IAC49-131   | CP27-108              | ?                 | Brazil     |
| IAC50-134   | Co419                 | Co285             | Brazil     |
| IAC51-205   | POJ2878               | ?                 | Brazil     |
| IAC52-150   | Co419                 | Co285             | Brazil     |
| IAC58-480   | POJ2878               | CP44-101          | Brazil     |
| IAC64-257   | Co419                 | IAC49-131         | Brazil     |
| IAC68-12    | Co419                 | IAC52-179         | Brazil     |
| IAC82-2045  | IAC65-113             | IAC52-150         | Brazil     |
| IAC82-3092  | CB41-76               | IAC68-12          | Brazil     |
| IAC83-4157  | IAC68-12              | SP70-1143         | Brazil     |
| IAC86-2210  | CP52-48               | Co798             | Brazil     |
| IAC87-3396  | Co740                 | SP70-1143         | Brazil     |
| IAC91-1099  | RB785148              | ?                 | Brazil     |
| IN84-58     | <i>S. spontaneum</i>  |                   |            |
| L60-14      | CP52-1                | CP48-103          | USA        |
| Maneria     | <i>S. sinense</i>     | <i>S. sinense</i> |            |
| NA56-79     | Co419                 | SELF              | Argentina  |
| NCo310      | Co421                 | Co312             | India      |
| POJ2878     | POJ2364               | EK28              | Indonesia  |
| R570        | H32-8560              | R445              | Reunion    |
| RB721012    | Co331                 | ?                 | Brazil     |
| RB72199     | NCo334                | ?                 | Brazil     |
| RB72454     | CP53-76               | ?                 | Brazil     |
| RB725053    | Co775                 | ?                 | Brazil     |
| RB725828    | NA56-79               | ?                 | Brazil     |
| RB732577    | NCo376                | ?                 | Brazil     |
| RB735200    | Co331                 | ?                 | Brazil     |
| RB735220    | CB44-95               | ?                 | Brazil     |

**S1 Table.** Continued.

| Accessions | Parent 1  | Parent 2  | Origin |
|------------|-----------|-----------|--------|
| RB735275   | IAC49-131 | ?         | Brazil |
| RB739359   | IANE55-34 | ?         | Brazil |
| RB739735   | CB52-179  | ?         | Brazil |
| RB75126    | C278      | ?         | Brazil |
| RB765418   | M253/48   | ?         | Brazil |
| RB785148   | IAC47-31  | ?         | Brazil |
| RB806043   | NA56-79   | ?         | Brazil |
| RB815690   | IAC49-131 | NA56-79   | Brazil |
| RB825317   | L60-14    | CB47-355  | Brazil |
| RB825336   | H53-3989  | ?         | Brazil |
| RB83102    | NA56-79   | SP70-1143 | Brazil |
| RB835019   | RB72454   | NA56-79   | Brazil |
| RB835054   | RB72454   | NA56-79   | Brazil |
| RB835089   | RB72454   | NA56-79   | Brazil |
| RB835205   | Co740     | ?         | Brazil |
| RB835486   | L60-14    | ?         | Brazil |
| RB845197   | RB72454   | SP70-1143 | Brazil |
| RB845210   | RB72454   | SP70-1143 | Brazil |
| RB845257   | RB72454   | SP70-1143 | Brazil |
| RB855002   | SP70-1143 | RB72454   | Brazil |
| RB855035   | L60-14    | SP70-1284 | Brazil |
| RB855036   | RB72454   | SP70-1143 | Brazil |
| RB855077   | SP70-1143 | TUC71-7   | Brazil |
| RB855113   | SP70-1143 | RB72454   | Brazil |
| RB855156   | RB72454   | TUC71-7   | Brazil |
| RB855206   | RB72454   | TUC71-7   | Brazil |
| RB855350   | RB72454   | ?         | Brazil |
| RB855453   | TUC71-7   | ?         | Brazil |
| RB855463   | RB72454   | ?         | Brazil |
| RB855465   | RB72454   | ?         | Brazil |
| RB855511   | SP71-1406 | ?         | Brazil |
| RB855536   | SP70-1143 | RB72454   | Brazil |
| RB855546   | SP70-1143 | RB72454   | Brazil |
| RB855563   | TUC71-7   | SP70-1143 | Brazil |
| RB855589   | SP70-1143 | TUC71-7   | Brazil |
| RB855595   | SP70-1143 | TUC71-7   | Brazil |
| RB867515   | RB72454   | ?         | Brazil |
| RB925211   | RB855206  | ?         | Brazil |
| RB925268   | RB855511  | ?         | Brazil |
| RB925345   | H59-1966  | ?         | Brazil |
| RB92579    | RB75126   | RB72199   | Brazil |
| RB935744   | RB835089  | RB765418  | Brazil |
| RB965902   | RB855536  | RB855453  | Brazil |
| RB965917   | RB855453  | RB855453  | Brazil |
| RB966928   | RB855156  | RB815690  | Brazil |
| SP70-1005  | IAC48-65  | ?         | Brazil |
| SP70-1078  | IAC48-65  | ?         | Brazil |
| SP70-1143  | IAC48-65  | ?         | Brazil |
| SP70-1284  | CB41-76   | ?         | Brazil |
| SP70-1423  | CB41-76   | ?         | Brazil |
| SP70-3370  | CP53-17   | ?         | Brazil |
| SP71-1406  | NA56-79   | ?         | Brazil |
| SP71-6163  | NA56-79   | ?         | Brazil |
| SP71-6949  | NA56-79   | ?         | Brazil |
| SP71-799   | NA56-79   | ?         | Brazil |
| SP72-4928  | CP52-48   | ?         | Brazil |
| SP77-5181  | HJ57-41   | ?         | Brazil |
| SP79-1011  | NA56-79   | Co775     | Brazil |

**S1 Table.** Continued.

| Accessions        | Parent 1                  | Parent 2  | Origin    |
|-------------------|---------------------------|-----------|-----------|
| SP79-2233         | H56-2954                  | ?         | Brazil    |
| SP79-2312         | SP71-6106                 | ?         | Brazil    |
| SP79-2313         | SP71-6106                 | ?         | Brazil    |
| SP79-6134         | H63-4644                  | ?         | Brazil    |
| SP79-6192         | SP70-3518                 | ?         | Brazil    |
| SP80-1520         | H48-3166                  | SP71-1088 | Brazil    |
| SP80-180          | B3337                     | ?         | Brazil    |
| SP80-1816         | SP71-1088                 | H57-5028  | Brazil    |
| SP80-1836         | SP71-1088                 | H57-5028  | Brazil    |
| SP80-1842         | SP71-1088                 | H57-5028  | Brazil    |
| SP80-185          | BO17                      | IAC50-134 | Brazil    |
| SP80-3280         | SP71-1088                 | H57-5028  | Brazil    |
| SP80-4966         | SP71-1406                 | ?         | Brazil    |
| SP81-1763         | Co775                     | NA56-79   | Brazil    |
| SP81-3250         | CP70-1547                 | SP71-1279 | Brazil    |
| SP83-2847         | HJ57-41                   | SP70-1143 | Brazil    |
| SP83-5073         | SP71-1406                 | SP71-1088 | Brazil    |
| SP89-1115         | CP73-1547                 | ?         | Brazil    |
| SP91-1049         | SP80-3328                 | SP81-3250 | Brazil    |
| TUC71-7           | CP52-68                   | CP62-258  | Argentina |
| White Transparent | <i>S. officinarum</i> spp |           | India     |
