# Supplementary material for: A genome-wide association study identified loci for yield component traits in sugarcane (Saccharum spp.)
Source: PubMed Central journal article supplement (PMC6638961; doi:10.1371/journal.pone.0219843), 2019-07-18
Supplement: pone.0219843.s002.pdf [file pone.0219843.s002.pdf]

**S2 Table. Selected Models for the  $\mathbf{G}_M$  Matrix and Number of Estimated Parameters ( $n_{par}$ ) Considering Each Trait Separately.** The Akaike (AIC) and Bayesian (BIC) information criteria were used to compare the structures of the variance–covariance matrix. The models for the  $\mathbf{G}_M$  matrix were selected according to the lowest value of the BIC criterion for BRIX as °Brix, stalk height (SH) in m, stalk number (SN) by direct counting, stalk weight (SW) in kg and cane yield (TCH) in t ha<sup>-1</sup> for BPSG over two harvest years (plant cane and first ratoon). Bold numbers represent the smallest AIC and BIC values.

| Trait                     | $\mathbf{G}_M$ matrix                    | Models       | $n_{par}$ | AIC             | BIC             |
|---------------------------|------------------------------------------|--------------|-----------|-----------------|-----------------|
| BRIX (°Brix)              | $\mathbf{G}_M = \mathbf{G}_{M \times M}$ | (1) ID       | 1         | 3191.28         | 3215.75         |
|                           |                                          | (2) DIAG     | 2         | 3189.78         | 3219.13         |
|                           |                                          | (3) AR1      | 2         | *               | *               |
|                           |                                          | (4) AR1(het) | 2         | <b>3103.14</b>  | <b>3137.38</b>  |
| SH (m)                    | $\mathbf{G}_M = \mathbf{G}_{M \times M}$ | (1) ID       | 1         | 500.28          | 524.77          |
|                           |                                          | (2) DIAG     | 2         | 502.51          | 531.51          |
|                           |                                          | (3) AR1      | 2         | *               | *               |
|                           |                                          | (4) AR1(het) | 2         | <b>359.93</b>   | <b>394.22</b>   |
| SN                        | $\mathbf{G}_M = \mathbf{G}_{M \times M}$ | (1) ID       | 1         | 9268.75         | 9293.21         |
|                           |                                          | (2) DIAG     | 2         | 9252.54         | 9281.89         |
|                           |                                          | (3) AR1      | 2         | *               | *               |
|                           |                                          | (4) AR1(het) | 2         | <b>9089.19</b>  | <b>9123.44</b>  |
| SW (Kg)                   | $\mathbf{G}_M = \mathbf{G}_{M \times M}$ | (1) ID       | 1         | 10515.65        | 10540.15        |
|                           |                                          | (2) DIAG     | 2         | 10514.88        | 10544.28        |
|                           |                                          | (3) AR1      | 2         | *               | *               |
|                           |                                          | (4) AR1(het) | 2         | <b>10378.72</b> | <b>10413.01</b> |
| TCH (t ha <sup>-1</sup> ) | $\mathbf{G}_M = \mathbf{G}_{M \times M}$ | (1) ID       | 1         | *               | *               |
|                           |                                          | (2) DIAG     | 2         | *               | *               |
|                           |                                          | (3) AR1      | 2         | *               | *               |
|                           |                                          | (4) AR1(het) | 2         | <b>11071.67</b> | <b>11106.08</b> |
