# Supplementary material for: A genome-wide association study identified loci for yield component traits in sugarcane (Saccharum spp.)
Source: PubMed Central journal article supplement (PMC6638961; doi:10.1371/journal.pone.0219843), 2019-07-18
Supplement: pone.0219843.s003.pdf [file pone.0219843.s003.pdf]

**S3 Table. SSR Fragments with the Largest Values of Contribution to Subpopulation Identification Detected Through the Loadingplot Function.** A threshold of 0.005 was used to declare the major contributions. LD: linear discriminant.

| LD  | Code  | Marker fragment | Values  |
|-----|-------|-----------------|---------|
| LD1 | M45   | CIR21_24        | 0.00549 |
| LD1 | M46   | CIR21_25        | 0.00575 |
| LD1 | M143  | ESTB67_01       | 0.00583 |
| LD1 | M149  | ESTB67_07       | 0.00566 |
| LD1 | M373  | CIR18_10        | 0.00608 |
| LD1 | M385  | CIR18_22        | 0.0051  |
| LD1 | M408  | ESTA31_18       | 0.00581 |
| LD1 | M409  | ESTA31_19       | 0.00675 |
| LD1 | M533  | ESTB47_04       | 0.00539 |
| LD1 | M572  | ESTB45_12       | 0.00611 |
| LD1 | M646  | ESTB111_01      | 0.00714 |
| LD1 | M688  | ESTC22_01       | 0.00681 |
| LD1 | M748  | SMC248_04       | 0.00532 |
| LD1 | M956  | ESTB125_10      | 0.00656 |
| LD1 | M959  | ESTB125_13      | 0.00543 |
| LD1 | M960  | ESTB125_14      | 0.0062  |
| LD1 | M1141 | ESTC130_17      | 0.00547 |
| LD1 | M1147 | ESTA70_05       | 0.00522 |
| LD1 | M1173 | ESTC77_10       | 0.00577 |
| LD1 | M1190 | ESTB106_01      | 0.0056  |
| LD1 | M1202 | ESTC124_06      | 0.00537 |
| LD1 | M1232 | ESTC81_13       | 0.00654 |
| LD1 | M1306 | ESTC52_04       | 0.00586 |
| LD1 | M1357 | ESTB66_07       | 0.00506 |
| LD2 | M20   | CIR23_20        | 0.0091  |
| LD2 | M24   | CIR21_03        | 0.00531 |
| LD2 | M52   | ESTA26_04       | 0.00501 |
| LD2 | M163  | ESTB68_01       | 0.00523 |
| LD2 | M281  | ESTA49_10       | 0.00507 |
| LD2 | M298  | ESTA33_04       | 0.00643 |
| LD2 | M308  | ESTA94_07       | 0.00614 |
| LD2 | M508  | ESTA54_13       | 0.00507 |
| LD2 | M729  | ESTC60_09       | 0.00561 |
| LD2 | M746  | SMC248_02       | 0.00549 |
| LD2 | M792  | ESTB133_05      | 0.00555 |
| LD2 | M845  | ESTB73_04       | 0.00658 |
| LD2 | M855  | ESTB73_14       | 0.00865 |

| LD  | Code  | Marker fragment | Values  |
|-----|-------|-----------------|---------|
| LD2 | M964  | ESTB125_18      | 0.00675 |
| LD2 | M1125 | ESTC130_01      | 0.00796 |
| LD2 | M1171 | ESTC77_08       | 0.00741 |
| LD2 | M1339 | ESTC35_02       | 0.00516 |
| LD2 | M1425 | ESTC84_10       | 0.00673 |
