# Supplementary material for: A genome-wide association study identified loci for yield component traits in sugarcane (Saccharum spp.)
Source: PubMed Central journal article supplement (PMC6638961; doi:10.1371/journal.pone.0219843), 2019-07-18

**Value of BIC  
versus number of clusters**

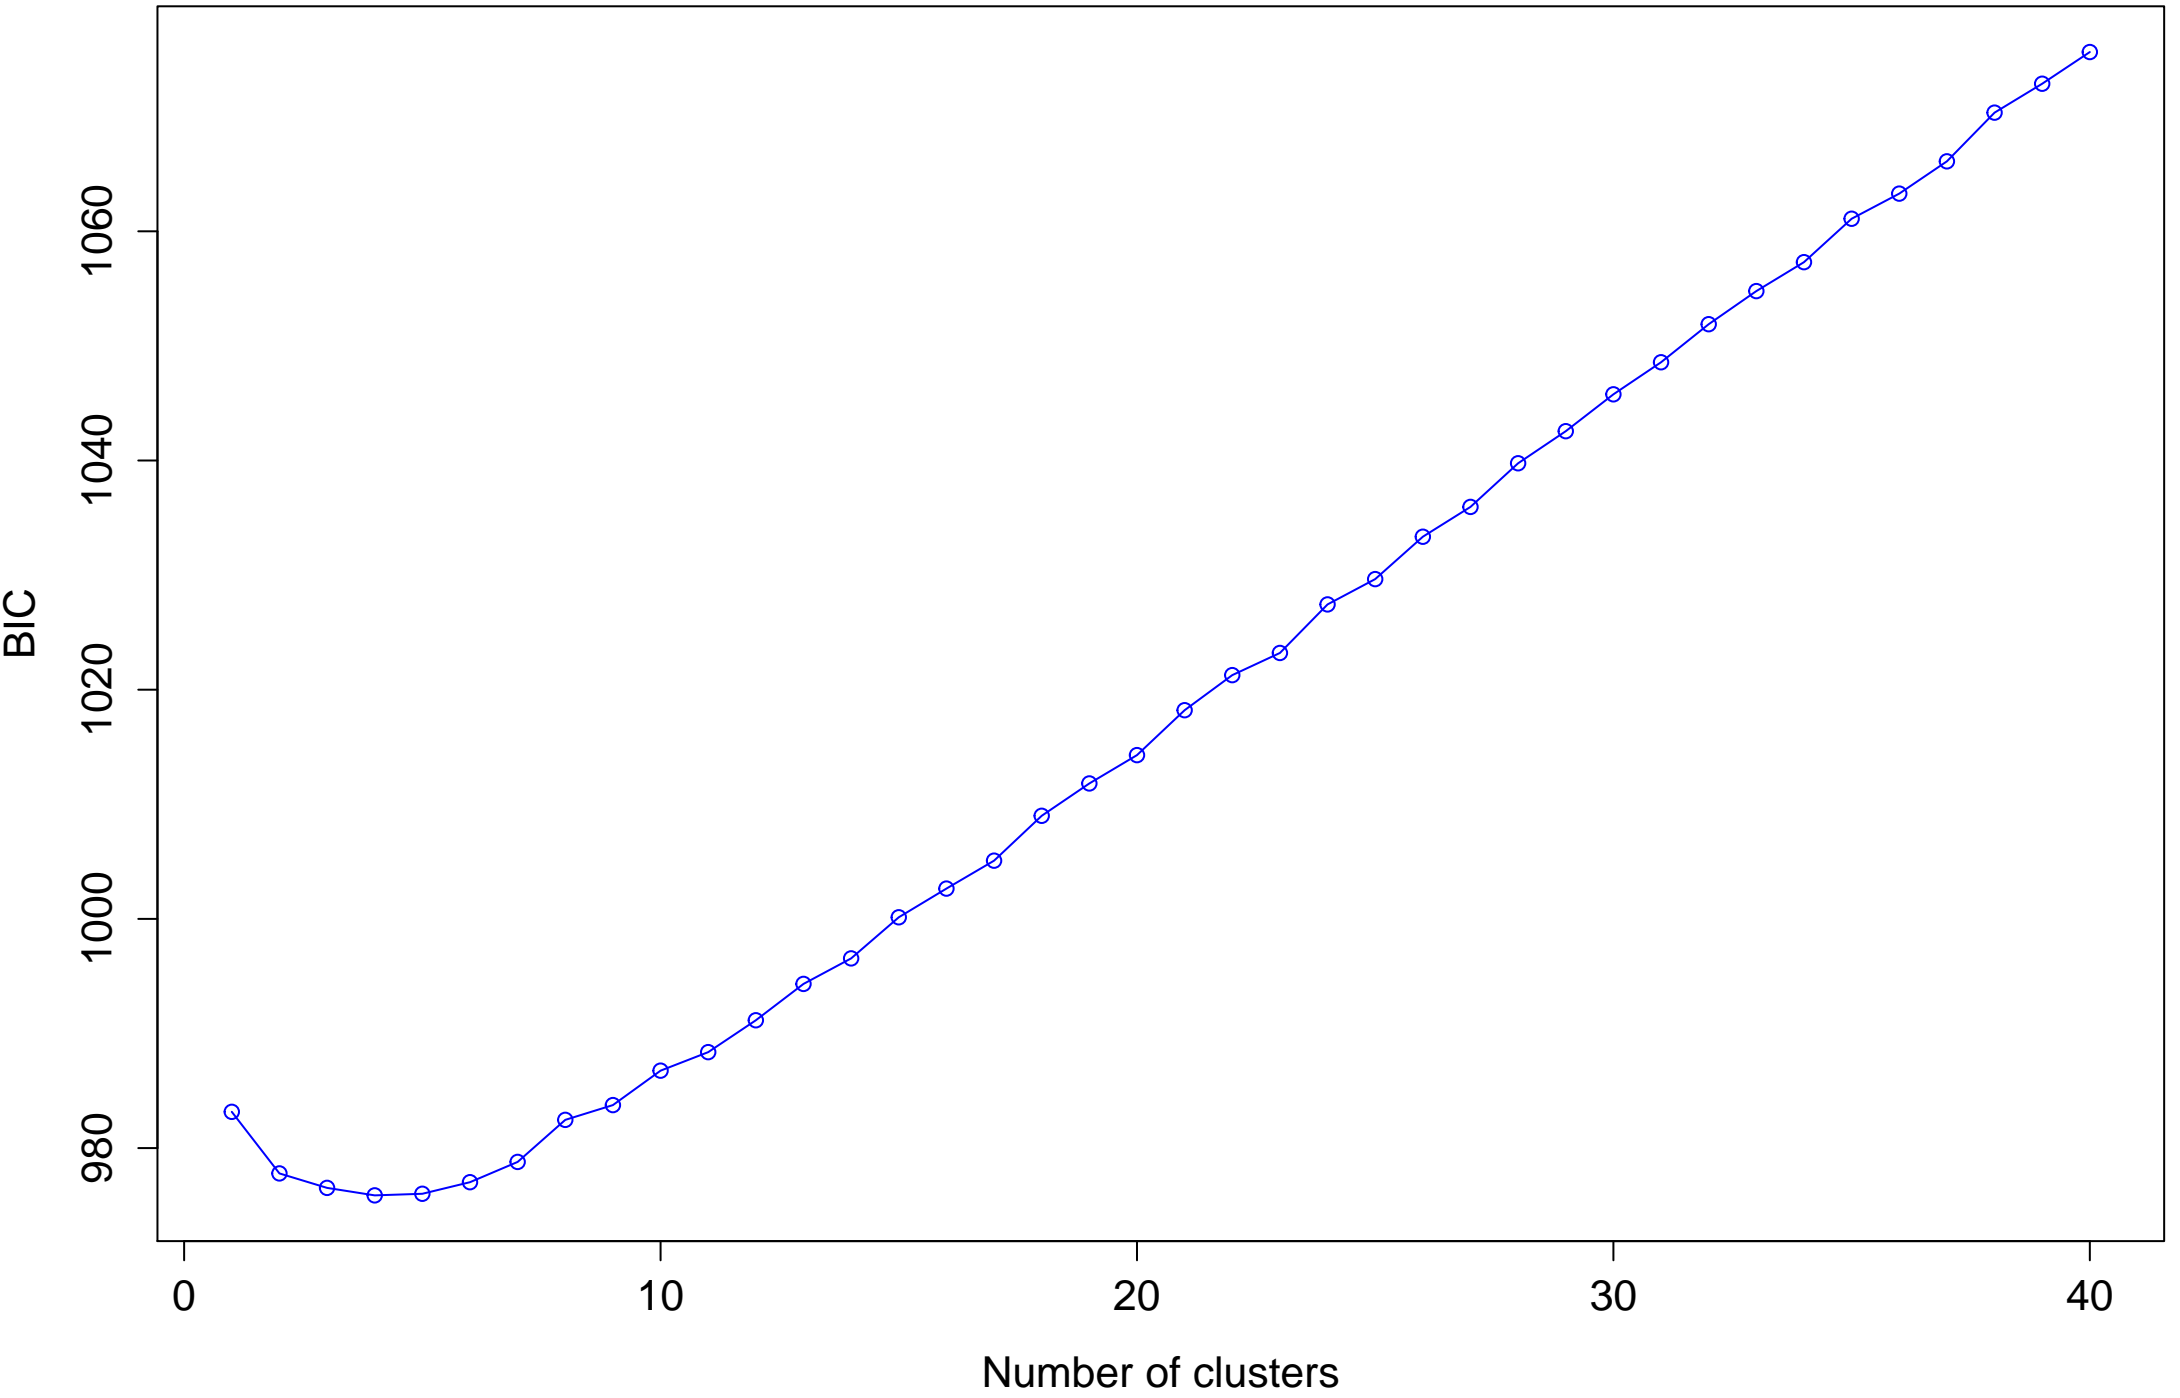

Supplement: pone.0219843.s004.pdf [file pone.0219843.s004.pdf]
