# Supplementary material for: A genome-wide association study identified loci for yield component traits in sugarcane (Saccharum spp.)
Source: PubMed Central journal article supplement (PMC6638961; doi:10.1371/journal.pone.0219843), 2019-07-18

# a-score optimisation – spline interpolation

Optimal number of PCs: 7

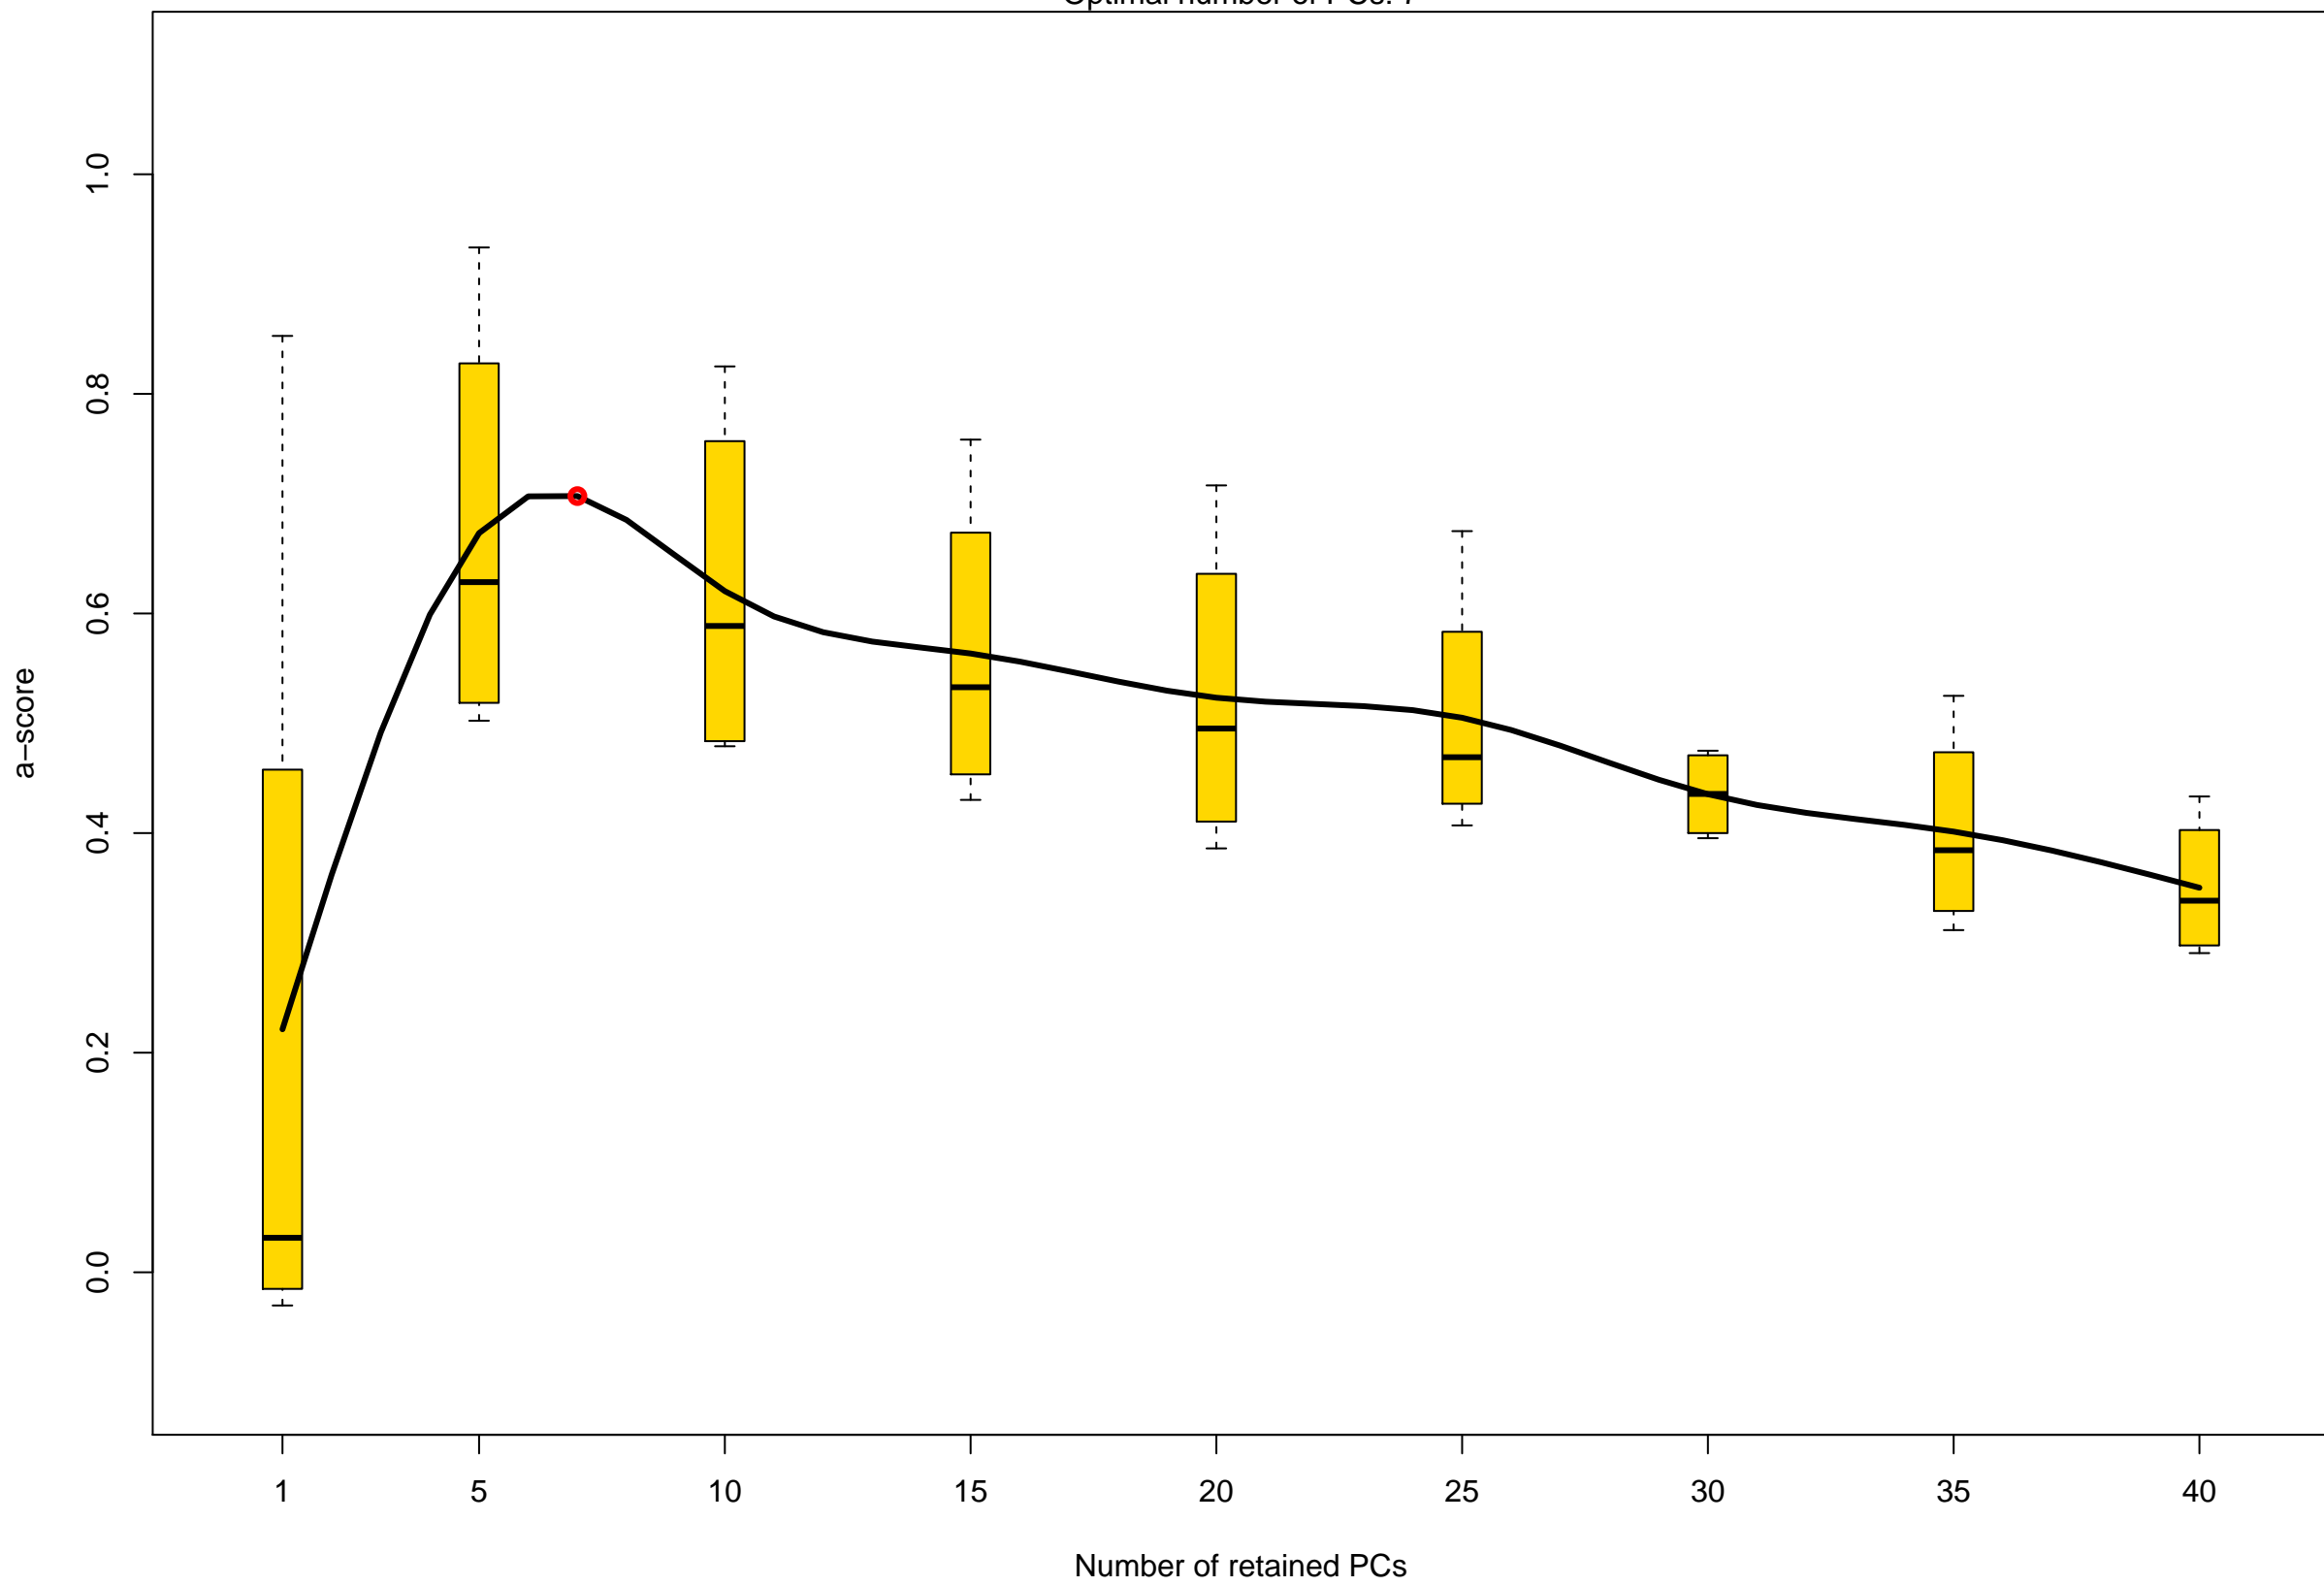

Supplement: pone.0219843.s006.pdf [file pone.0219843.s006.pdf]
